# Supplementary material for: 2D WS2-edge functionalized multi-channel carbon nanofibers: effect of WS2 edge-abundant structure on room temperature NO2 sensing
Source: Royal Society of Chemistry journal article supplement (doi:10.1039/c6ta11019c), 2017-01-01
Supplement: c6ta11019c1.pdf [file c6ta11019c1.pdf]

## Supporting Information

# 2D WS<sub>2</sub>-Edge Functionalized Multi-Channel Carbon Nanofibers: Effect of WS<sub>2</sub> Edge-Abundant Structure on Room-Temperature NO<sub>2</sub> Sensing

*Jun-Hwe Cha,<sup>†</sup> Seon-Jin Choi,<sup>†,‡</sup> Sunmoon Yu,<sup>†</sup> and Il-Doo Kim<sup>†,\*</sup>*

<sup>†</sup>Department of Materials Science and Engineering,  
Korea Advanced Institute of Science and Technology,  
291 Daehak-ro, Yuseong-gu, Daejeon 34141, Republic of Korea  
\*E-mail: [ldkim@kaist.ac.kr](mailto:ldkim@kaist.ac.kr)

<sup>‡</sup>Applied Science Research Institute,  
Korea Advanced Institute of Science and Technology,  
291 Daehak-ro, Yuseong-gu, Daejeon 34141, Republic of Korea

## S1. WS<sub>2</sub>@CNFs

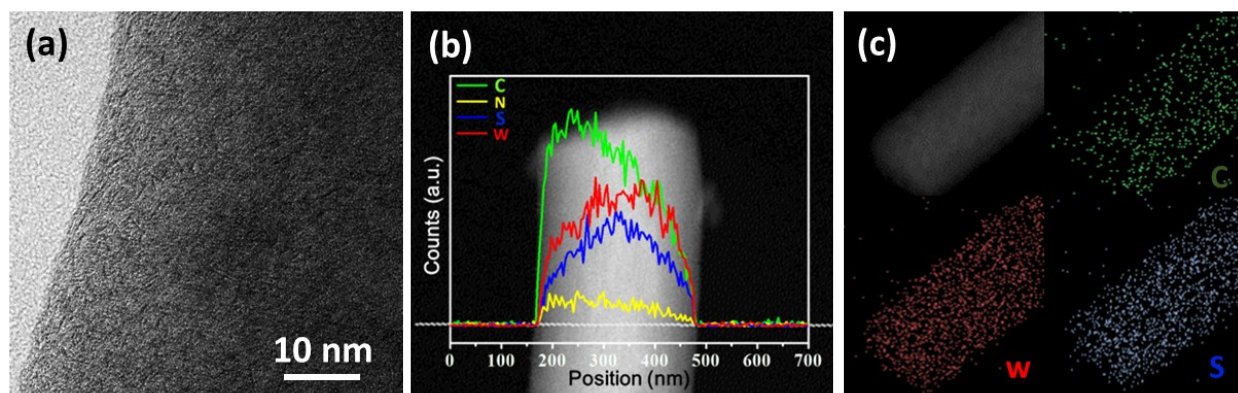

**Figure S1.** (a) HRTEM image of WS<sub>2</sub>@CNFs. (b) STEM image of WS<sub>2</sub>@CNFs on which EDS line-scan profile of W, S, N, and C is presented. (c) STEM image and STEM-EDS mapping image of WS<sub>2</sub>@CNFs: W (red), S (sky-blue), and C (green).

## S2. TEM images of WS<sub>2</sub>@MTCNFs and CNFs

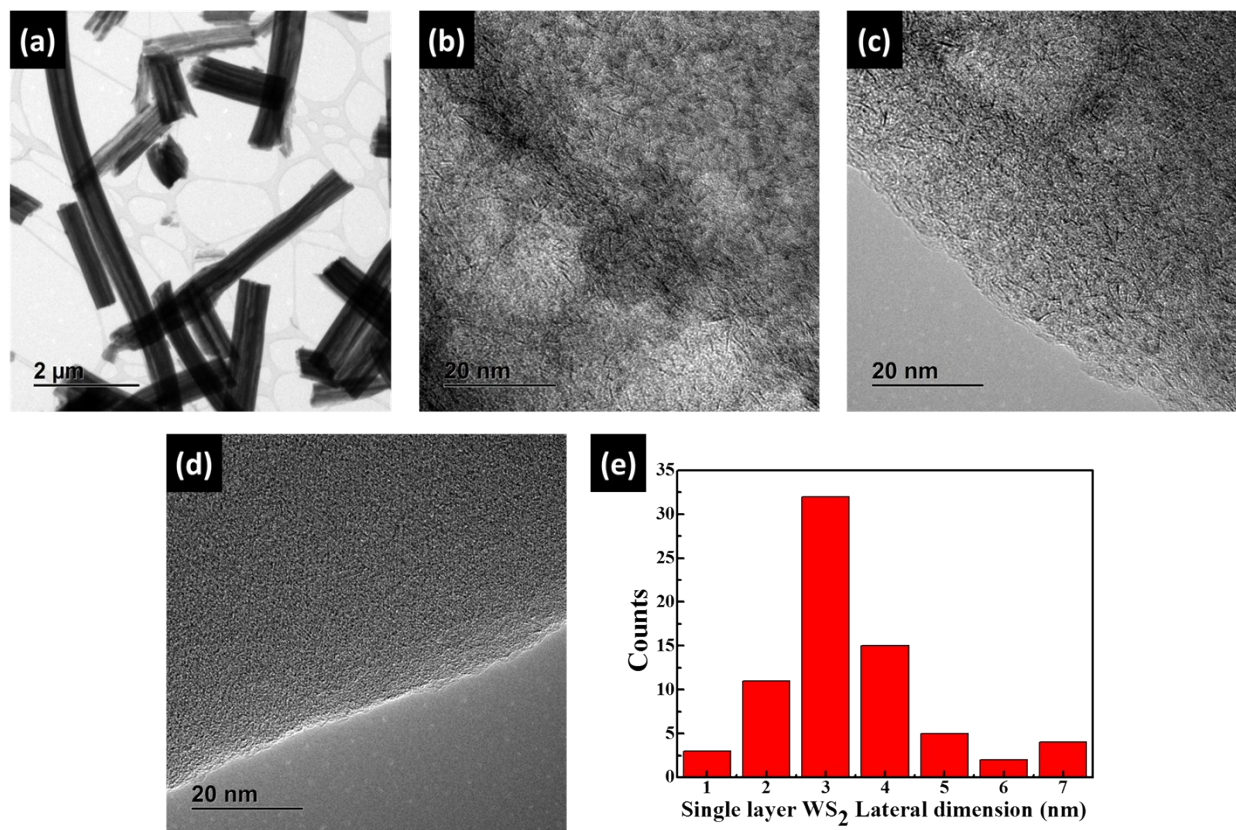

**Figure S2.** (a) TEM image of WS<sub>2</sub>@MTCNFs. HRTEM images of (b-c) WS<sub>2</sub>@MTCNFs and (d) CNFs. (e) Lateral dimension size distribution histogram of single layer WS<sub>2</sub> in MTCNFs.

### S3. XRD patterns of WS<sub>2</sub>@MTCNFs

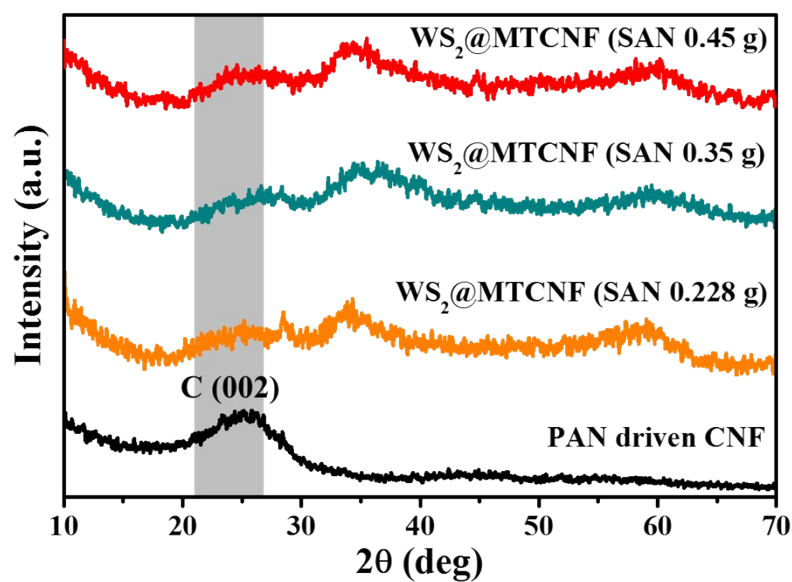

**Figure S3.** XRD patterns of WS<sub>2</sub>@MTCNFs with SAN 0.450 g, SAN 0.350 g, and SAN 0.228 g and PAN-driven CNFs, respectively.

#### S4. XPS spectra of the WS<sub>2</sub>@MTCNFs : C 1s peaks

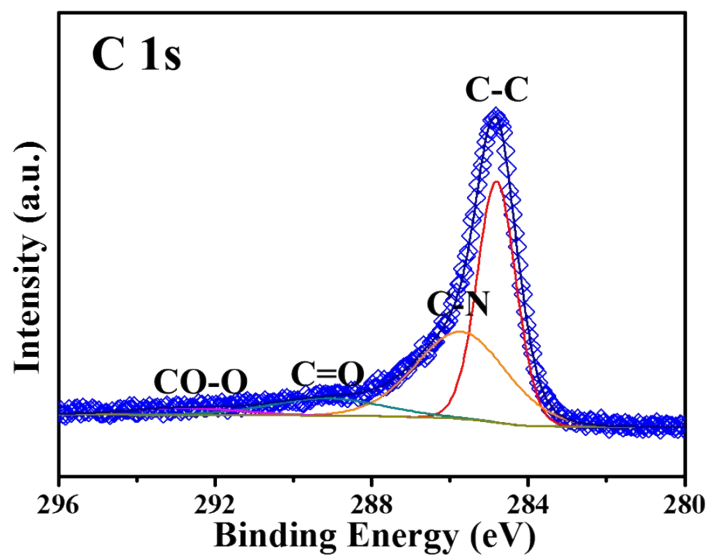

**Figure S4.** XPS spectra of the WS<sub>2</sub>@MTCNFs : C 1s peaks

## S5. Ex-situ XPS analysis in humid condition

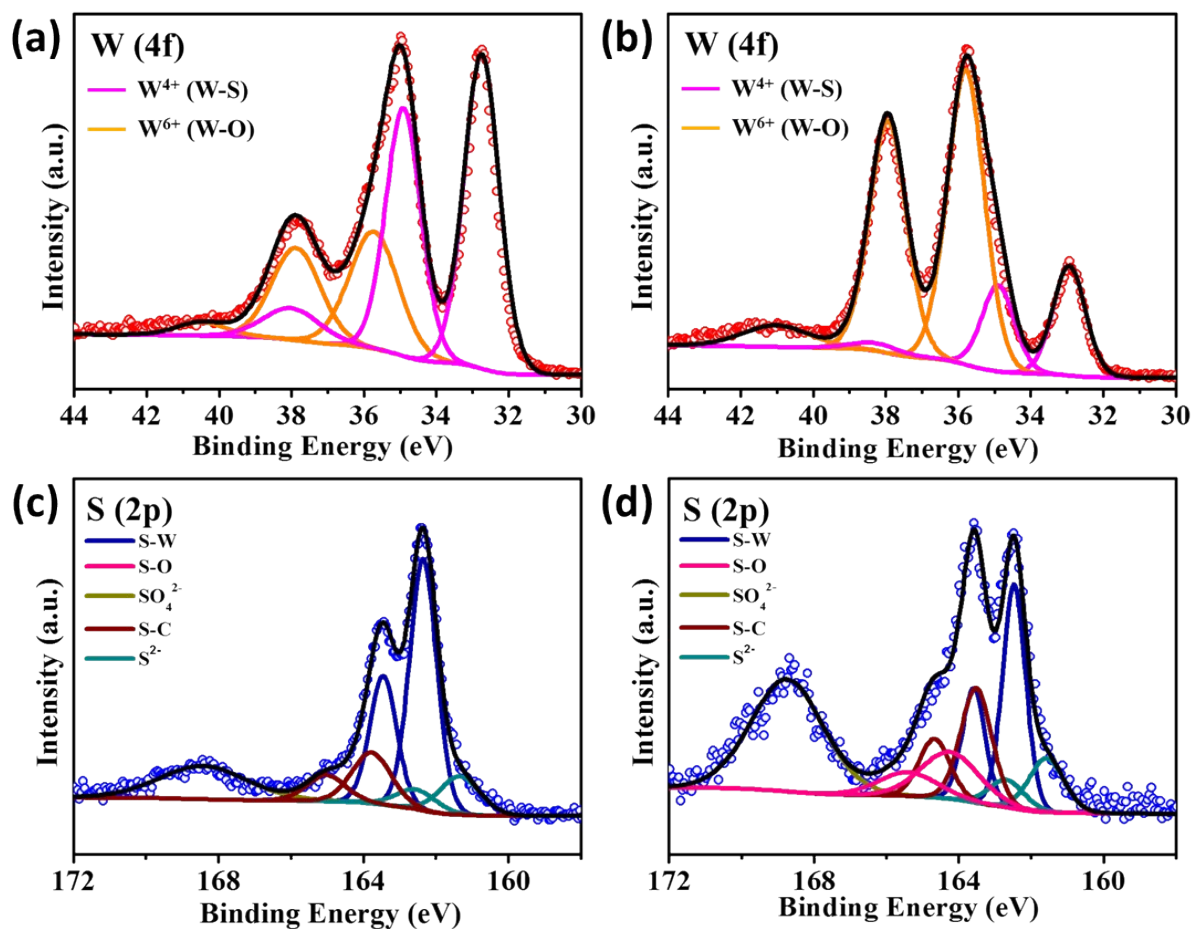

**Figure S5.** Ex-situ XPS analysis with  $\text{WS}_2@\text{MTCNFs}$ : W 4f spectra (a) before and (b) after exposure to  $\text{NO}_2$  in humid condition. S 2p spectra (c) before and (d) after exposure to  $\text{NO}_2$  in humid condition.

## S6. Sensing characteristics of CNFs and WS<sub>2</sub>@MTCNFs

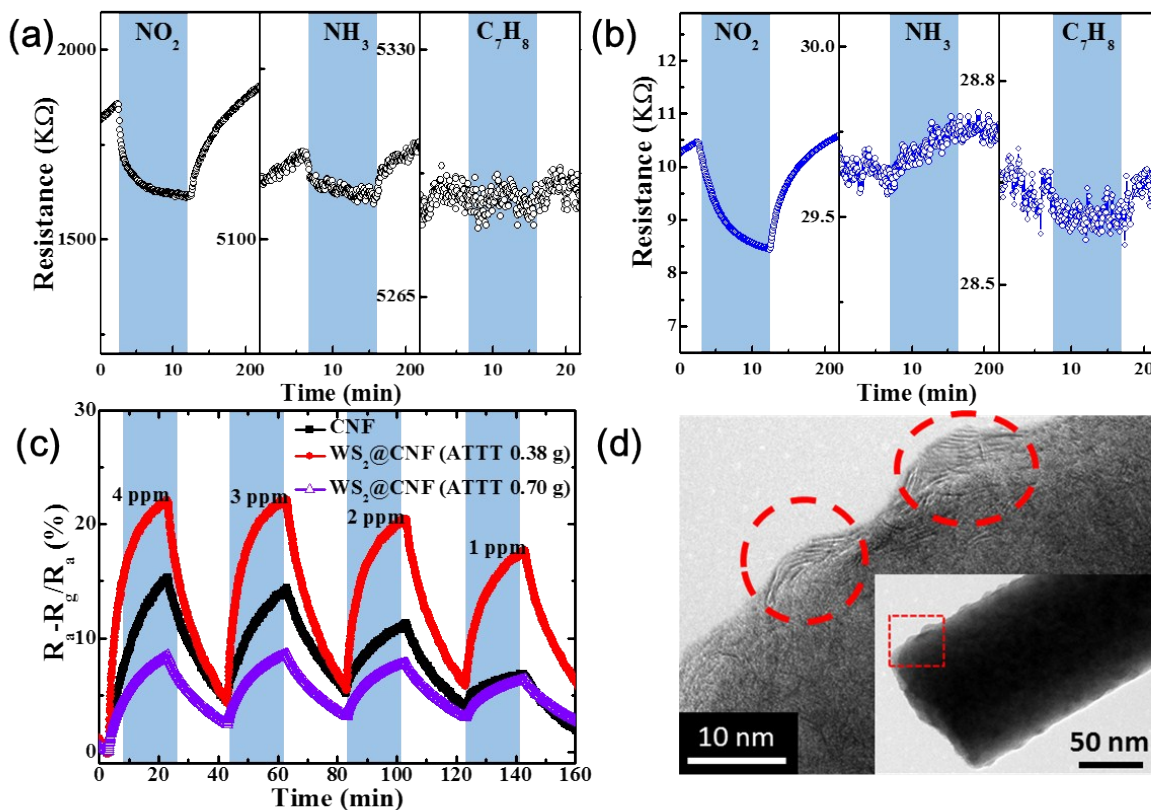

**Figure S6.** (a) Dynamic resistance transition characteristics of CNFs toward 5 ppm of NO<sub>2</sub>, NH<sub>3</sub>, and C<sub>7</sub>H<sub>8</sub>. (b) Dynamic resistance transition characteristics of WS<sub>2</sub>@MTCNFs toward 5 ppm of NO<sub>2</sub>, NH<sub>3</sub>, and C<sub>7</sub>H<sub>8</sub>. (c) Dynamic response transients of CNFs, WS<sub>2</sub>@CNFs (ATTT 0.38 g), and WS<sub>2</sub>@CNFs (ATTT 0.7 g) toward NO<sub>2</sub> in the concentration range of 4-1 ppm at room temperature. (d) TEM image and HRTEM image of WS<sub>2</sub>@CNFs (ATTT 0.7 g)

The sensing tendency of the dense CNFs and WS<sub>2</sub>@MTCNFs toward NH<sub>3</sub> based on resistance might be further supported by edge effects exerted by WS<sub>2</sub> nanoflakes distributed on the surface. During exposure to NH<sub>3</sub>, the resistance of the dense CNFs decreases due to the electron

donating property of  $\text{NH}_3$  molecules. According to previous studies, carbon-based gas sensors such as carbon nanotubes and graphene exhibiting n-type sensing behavior against reducing gases even though carbon nanofibers exhibit a p-type response in oxidizing gases.<sup>1-2</sup> In the present study, the resistance of  $\text{WS}_2$ -edge functionalized CNFs ( $\text{WS}_2@\text{MTCNFs}$ ) is increased with no recovery when  $\text{NH}_3$  gas was injected, which is identical in sensing tendency toward  $\text{NH}_3$  of layered  $\text{MoS}_2$ .<sup>3-4</sup>



## S7. Ex-situ XPS analysis in dry condition

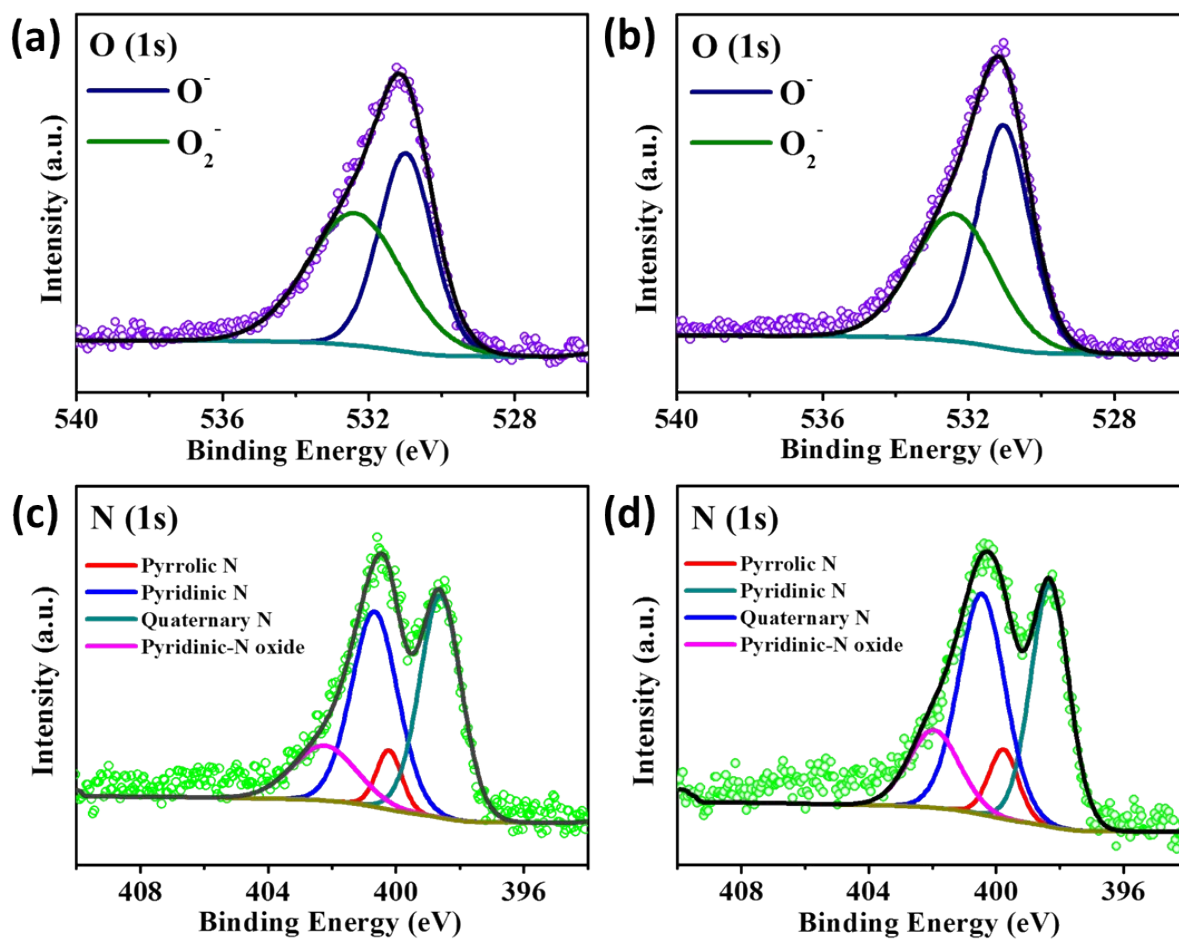

**Figure S7.** Ex-situ XPS analysis with  $\text{WS}_2@\text{MTCNFs}$ : O 1s spectra (a) before and (b) after exposure to  $\text{NO}_2$  in dry air. N 1s spectra (c) before and (d) after exposure to  $\text{NO}_2$  in dry air.

## S8. Temperature dependency of sensing characteristics of WS<sub>2</sub>@MTCNFs

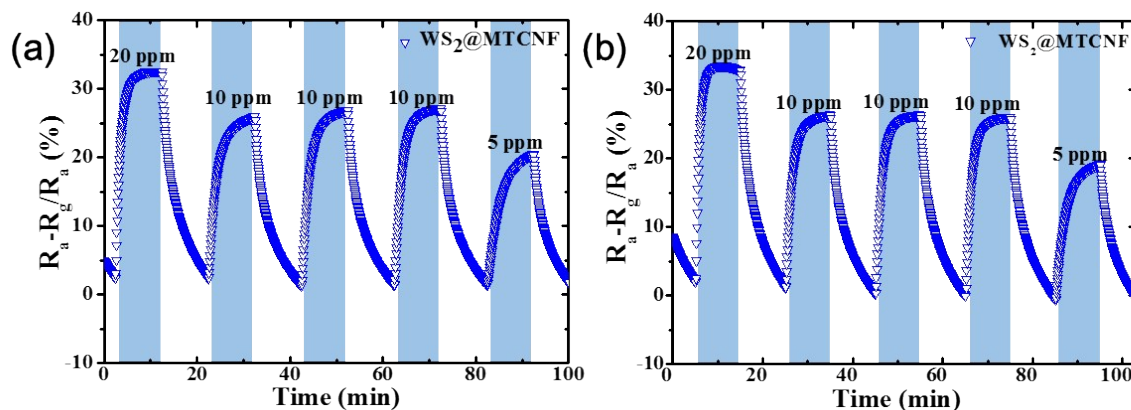

**Figure S8.** Dynamic response transients of WS<sub>2</sub>@MTCNFs toward NO<sub>2</sub> in the concentration range of 20-5 ppm at (a) 25 °C and (b) 80 °C.

For analysis regarding temperature dependency of the sensing materials, the sensing performance of WS<sub>2</sub>@MTCNFs was characterized at 80 °C in the concentrations of 20, 10, and 5 ppm. As a result, any enhancement in response of the WS<sub>2</sub>@MTCNFs was not observed, showing that the sensing material are not affected much by temperature.

## S9. SEM images

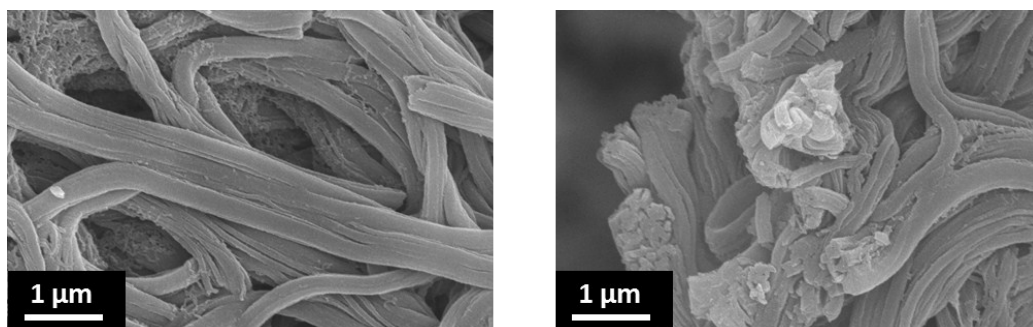

**Figure S9.** SEM images of CNFs obtained from combination of PAN and SAN without ATTT, followed by heat treatment. It shows that the morphology of synthesized products is much different from that of WS<sub>2</sub>@MTCNFs.

## S10. Comparison with other WS<sub>2</sub> gas sensors

**Table S1.** Recent publications on a variety of WS<sub>2</sub> based gas sensors.

| Gas species     | Materials                             | Working temperature | Balance gas        | Measurement          | Response         | Exposure time | Detection limit | reference |
|-----------------|---------------------------------------|---------------------|--------------------|----------------------|------------------|---------------|-----------------|-----------|
| Various gases   | Multilayer WS <sub>2</sub> nanoflakes | Room temp.          | Dry                | Source drain current | –                | ~25 s         | –               | 5         |
| Humidity        | WS <sub>2</sub> Nanoparticles         | Room temp.          | Air                | Current              | –                | ~200 s        | –               | 6         |
| Methanol        | Metallic 1T WS <sub>2</sub>           | Room temp.          | Humid air          | Impedance            | –                | –             | –               | 7         |
| H <sub>2</sub>  | WS <sub>2</sub> -Pd composite film    | Room temp.          | Dry N <sub>2</sub> | Resistance           | 380% at 1000 ppm | 30 min        | 10 ppm          | 8         |
| NH <sub>3</sub> | 2nm-WS <sub>2</sub> film              | Room temp.          | Dry N <sub>2</sub> | Resistance           | 0.2% at 60 ppm   | 2 min         | 1.2 ppm         | 9         |
| NH <sub>3</sub> | Fluorinated 1L WS <sub>2</sub>        | Room temp.          | Dry air            | PL intensity         | –                | 2 min         | –               | 10        |
| NO <sub>2</sub> | Ag-NW@WS <sub>2</sub> nanosheets      | 100 °C              | Dry air            | Current              | 60% at 25 ppm    | 5 min         | –               | 11        |
| NO <sub>2</sub> | WS <sub>2</sub> @MTCNFs               | Room temp.          | Dry air            | Resistance           | 15% at 1 ppm     | 20 min        | 10 ppb          | This work |

# S11. Comparison with other TMD gas sensors for NO<sub>2</sub> sensing

**Table S2.** Recent publications on TMD based gas sensors toward NO<sub>2</sub> sensing.

| Gas species     | Materials                                 | Working temperature | Balance gas        | Measurement          | Response          | Exposure time | Detection limit | reference |
|-----------------|-------------------------------------------|---------------------|--------------------|----------------------|-------------------|---------------|-----------------|-----------|
| NO <sub>2</sub> | Thin-layered MoS <sub>2</sub>             | Room temp.          | Dry N <sub>2</sub> | Source drain current | 1372% at 1000 ppm | ~300 s        | –               | 3         |
|                 | Atomic-layer MoS <sub>2</sub>             | Room temp.          | Dry air            | Resistance           | 27% at 20 ppm     | 2 min         | –               | 4         |
|                 | CVD Atomic-layer MoS <sub>2</sub>         | Room temp.          | Dry N <sub>2</sub> | Resistance           | 150% at 1200 ppb  | 5 min         | 120 ppb         | 12        |
|                 | Graphene/MoS <sub>2</sub>                 | 100 °C              | Dry N <sub>2</sub> | Resistance           | 3% at 1.2 ppm     | 5 min         | –               | 13        |
|                 | Graphene/MoS <sub>2</sub>                 | 150 °C              | Dry air            | Resistance           | 3% at 5 ppm       | 5 min         | –               | 14        |
|                 | MoS <sub>2</sub> /SnO <sub>2</sub>        | Room temp.          | Dry air            | Conductance          | 0.6% at 0.5 ppm   | ~750 s        | 0.5 ppm         | 15        |
|                 | Exfoliated MoS <sub>2</sub> flakes        | 200 °C              | Dry air            | Resistance           | 1.6 at 1 ppm      | 120 min       | 20 ppb          | 16        |
|                 | Vertically aligned MoS <sub>2</sub>       | Room temp.          | Dry N <sub>2</sub> | Resistance           | 4% at 100 ppm     | 10 min        | –               | 17        |
|                 | MoS <sub>2</sub> /Graphene hybrid aerogel | 200 °C              | Dry N <sub>2</sub> | Resistance           | 9% at 0.5 ppm     | 10 min        | 14 ppb          | 18        |
|                 | Ag-NW@WS <sub>2</sub> nanosheets          | 100 °C              | Dry air            | Current              | 60% at 25 ppm     | 5 min         | –               | 11        |
|                 | WS <sub>2</sub> @MTCNFs                   | Room temp.          | Dry air            | Resistance           | 15% at 1 ppm      | 20 min        | 10 ppb          | This work |

## Note and References

- 1 W. Li, L. S. Zhang, Q. Wang, Y. Yu, Z. Chen, C. Y. Cao, W. G. Song, *J. Mater. Chem.*, 2012, **22**, 15342
- 2 D. N. Ventura, S. Li, C. A. Baker, C. J. Breshike, A. L. Spann, G. F. Strouse, H. W. Kroto, S. F. A. Acquah, *Carbon* 2012, **50**, 2672
- 3 D. J. Late, Y. K. Huang, B. Liu, J. Acharya, S. N. Shirodkar, J. J. Luo, A. M. Yan, D. Charles, U. V. Waghmare, V. P. Dravid, C. N. R. Rao, *ACS Nano* 2013, **7**, 4879
- 4 B. Cho, M. G. Hahm, M. Choi, J. Yoon, A. R. Kim, Y. J. Lee, S. G. Park, J. D. Kwon, C. S. Kim, M. Song, Y. Jeong, K. S. Nam, S. Lee, T. J. Yoo, C. G. Kang, B. H. Lee, H. C. Ko, P. M. Ajayan, D. H. Kim, *Sci. Rep.* 2015, **5**.
- 5 N. J. Huo, S. X. Yang, Z. M. Wei, S. S. Li, J. B. Xia, J. B. Li, *Sci. Rep.* 2014, **4**.
- 6 A. S. Pawbake, R. G. Waykar, D. J. Late, S. R. Jadkar, *ACS Appl. Mater. Inter.* 2016, **8**, 3359
- 7 C. C. Mayorga-Martinez, A. Ambrosi, A. Y. S. Eng, Z. Sofer, M. Pumera, *Adv. Funct. Mater.* 2015, **25**, 5611.
- 8 C. Kuru, D. Choi, A. Kargar, C. H. Liu, S. Yavuz, C. Choi, S. Jin, P. R. Bandaru, *Nanotechnology* 2016, **27**.
- 9 M. O'Brien, K. Lee, R. Morrish, N. C. Berner, N. McEvoy, C. A. Wolden, G. S. Duesberg, *Chem. Phys. Lett.* 2014, **615**, 6.
- 10 Y. I. Jhon, Y. Kim, J. Park, J. H. Kim, T. Lee, M. Seo, Y. M. Jhon, *Adv. Funct. Mater.* 2016, **26**, 7541.
- 11 K. Y. Ko, J.-G. Song, Y. Kim, T. Choi, S. Shin, C. W. Lee, K. Lee, J. Koo, H. Lee, J. Kim, *ACS Nano* 2016, **10**, 9287.
- 12 B. Cho, A. R. Kim, Y. Park, J. Yoon, Y. J. Lee, S. Lee, T. J. Yoo, C. G. Kang, B. H. Lee, H. C. Ko, D. H. Kim, M. G. Hahm, *ACS Appl. Mater. Inter.* 2015, **7**, 2952.
- 13 B. Cho, J. Yoon, S. K. Lim, A. R. Kim, D. H. Kim, S. G. Park, J. D. Kwon, Y. J. Lee, K. H. Lee, B. H. Lee, H. C. Ko, M. G. Hahm, *ACS Appl. Mater. Inter.* 2015, **7**, 16775.
- 14 B. Cho, J. Yoon, S. K. Lim, A. R. Kim, S. Y. Choi, D. H. Kim, K. H. Lee, B. H. Lee, H. C. Ko, M. G. Hahm, *Sensors* 2015, **15**, 24903.
- 15 S. M. Cui, Z. H. Wen, X. K. Huang, J. B. Chang, J. H. Chen, *Small* 2015, **11**, 2305.
- 16 M. Donarelli, S. Prezioso, F. Perrozzi, F. Bisti, M. Nardone, L. Giancaterini, C. Cantalini, L. Ottaviano, *Sens. Actuators, B* 2015, **207**, 602.

- 17 S. Y. Cho, S. J. Kim, Y. Lee, J. S. Kim, W. B. Jung, H. W. Yoo, J. Kim, H. T. Jung, *ACS Nano* 2015, **9**, 9314.
- 18 H. Long, A. Harley-Trochimczyk, T. Pham, Z. R. Tang, T. L. Shi, A. Zettl, C. Carraro, M. A. Worsley, R. Maboudian, *Adv. Funct. Mater.* 2016, **26**, 5158.
